# Supplementary material for: Insulating oxide film formation with acid catalyzed hydrolysis of alkoxide precursors in supercritical fluid carbon dioxide
Source: Royal Society of Chemistry journal article supplement (doi:10.1039/c5ra09594h), 2015-01-01

### Supporting Information

#### Insulating Oxide Film Formation with Acid Catalyzed Hydrolysis of Alkoxide Precursors in Supercritical Fluid Carbon Dioxide

Joanna S. Wang,<sup>1\*</sup> Chien. M. Wai,<sup>2</sup> Gail J. Brown,<sup>1</sup> Scott D. Apt<sup>1</sup>

<sup>1</sup>*Air Force Research Laboratory, Materials and Manufacturing Directorate, WPAFB, Ohio  
45433-7707, USA*

<sup>2</sup>*Department of Chemistry, University of Idaho, Moscow, ID 83844, USA*

Figure S-1. The spectra of X-ray photoelectron spectroscopy (XPS) of SiO<sub>2</sub> film were acquired. The binding energies of Si 2s and 2p peaks of SiO<sub>2</sub> coatings are 154.4 eV and 103.3 eV, respectively. The binding energy of O 1s peak on SiO<sub>2</sub> film is 532.4 eV.

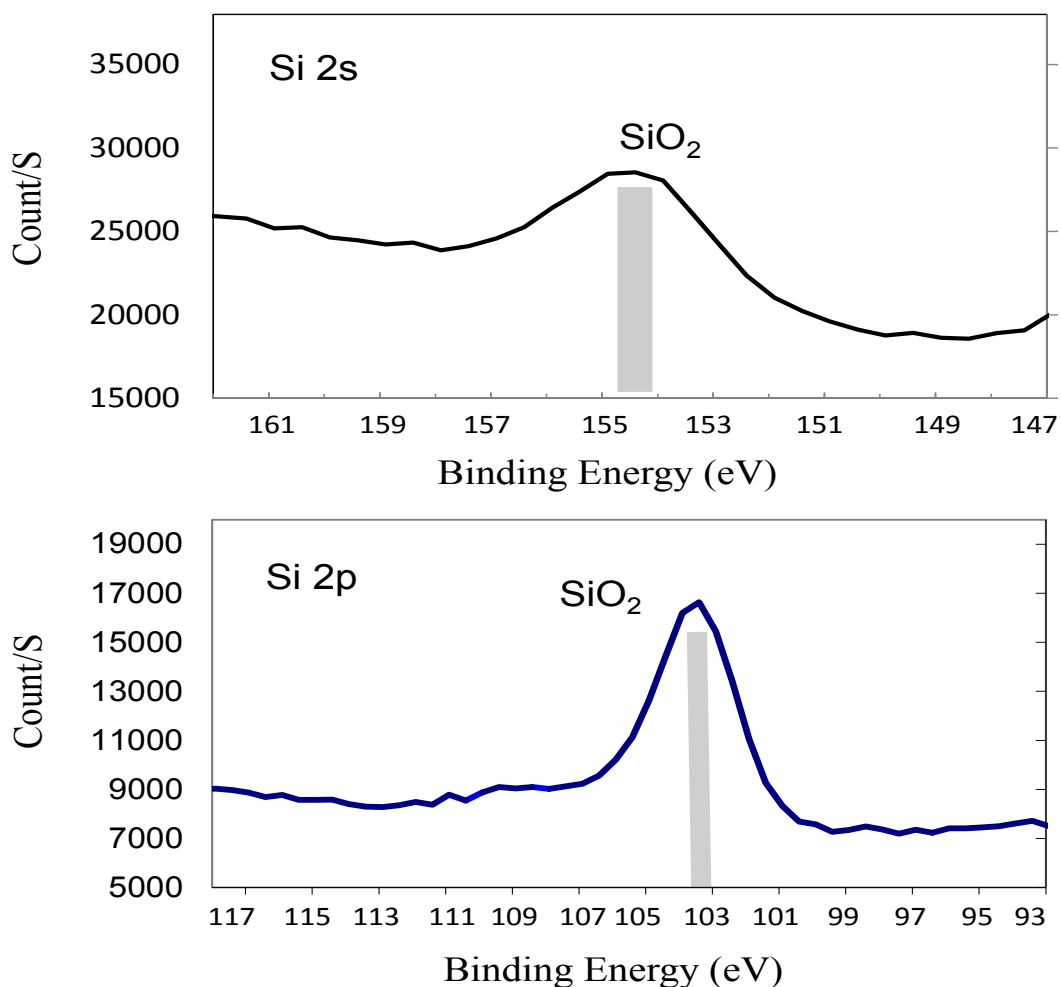

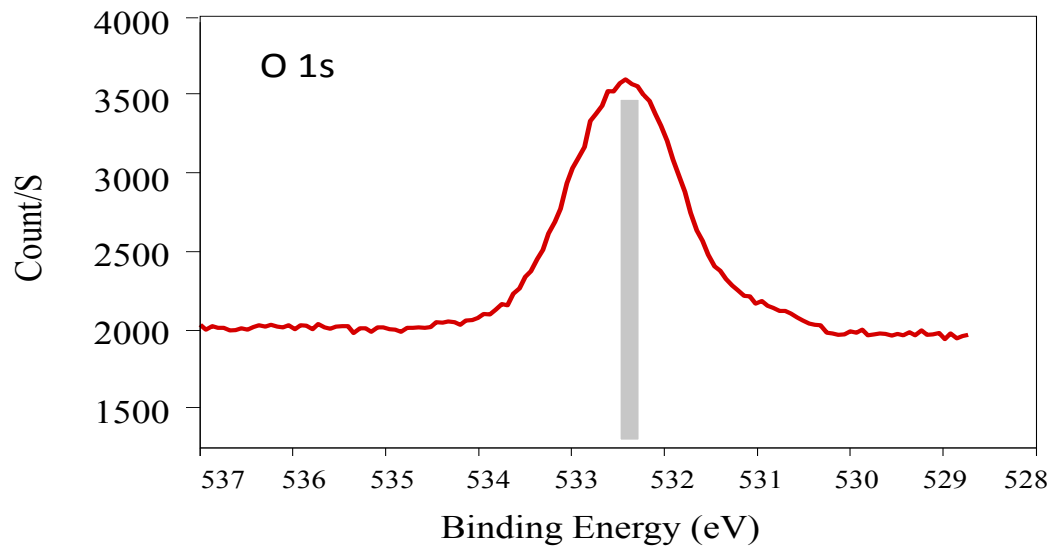

Supplement: c5ra09594h1.pdf [file c5ra09594h1.pdf]
